# Supplementary material for: Ways Ahead: developing a supported self-management programme for people living with low- and intermediate-grade gliomas - a protocol for a multi-method study
Source: PubMed Central journal article supplement — BMJ Open. 2020 Jul 29;10(7):e041465. doi: 10.1136/bmjopen-2020-041465 (PMC7394298; doi:10.1136/bmjopen-2020-041465), 2020-07-29
Supplement: bmjopen-2020-041465.reviewer_comments.pdf [file bmjopen-2020-041465.reviewer_comments.pdf]

## PEER REVIEW HISTORY

BMJ Open publishes all reviews undertaken for accepted manuscripts. Reviewers are asked to complete a checklist review form (<http://bmjopen.bmj.com/site/about/resources/checklist.pdf>) and are provided with free text boxes to elaborate on their assessment. These free text comments are reproduced below.

## ARTICLE DETAILS

|                            |                                                                                                                                                              |
|----------------------------|--------------------------------------------------------------------------------------------------------------------------------------------------------------|
| <b>TITLE (PROVISIONAL)</b> | Ways Ahead: Developing a supported self-management programme for people living with low- and intermediate-grade gliomas. A protocol for a multi-method study |
| <b>AUTHORS</b>             | Rimmer, Ben; Dutton, Lizzie; Lewis, Joanne; Burns, Richéal; Gallagher, Pamela; Williams, Sophie; Araujo-Soares, Vera; Finch, Tracy; Sharp, Linda             |

This article was not externally reviewed at BMJ Open. Protocols that have been independently assessed prior to submission to BMJ Open are usually fast-tracked to publication on the grounds that further substantial changes will not be possible. This independent assessment will usually be external, independent review for both a substantial grant award from a non-commercial or government funder and ethics approval.
